# Supplementary material for: Quantitative PCR provides a simple and accessible method for quantitative microbiota profiling
Source: PubMed Central journal article supplement (PMC6961887; doi:10.1371/journal.pone.0227285), 2020-01-15
Supplement: pone.0227285.s003.pdf [file pone.0227285.s003.pdf]

**S1 Table. List of primers and PCR conditions used in this study.**

| Target                                                                                            | Primer sequence (5'-3')                                                      | Amplikon size | Mg (mM) | Annealing (°C) | Detection (°C) | Amount of template DNA for | Standard/reference organism for qPCR | Coverage (%)** | Original reference |
|---------------------------------------------------------------------------------------------------|------------------------------------------------------------------------------|---------------|---------|----------------|----------------|----------------------------|--------------------------------------|----------------|--------------------|
| Bacteria (qPCR)                                                                                   | F: 5'-TCCTACGGGAGGCGAGCT-3'<br>R: 5'-GGACTACCCAGGGTATCTAATCTGTT-3'           | 466           | 3       | 50             | 82             | 0.5                        | <i>B. longum</i>                     | 83.1**         | [1]                |
| Bacteria (16S rRNA gene V3-V4 amplicon sequencing)                                                | F: 5'-CCTACGGGNGCGCAG-3'<br>R: 5'-GACTACHVGGGTATCTAATCC-3'                   | 444           | -       | -              | -              | -                          | -                                    | 95**           | [2]                |
| <i>Bacteroides-Prevotella-Porphyrionomus</i>                                                      | F: 5'-GGTGTGGCTAAGTGCCAT-3'<br>R: 5'-CGGAYGTAAAGGGCCGTGC-3'                  | 140           | 3       | 68             | 80             | 0.5                        | <i>B. fragilis</i>                   | 95.8           | [3]                |
| <i>Bifidobacterium</i> spp.                                                                       | F: 5'-TCGCTCYGGTGAAG-3'<br>R: 5'-CCACATCCAGCTCCAC-3'                         | 243           | 3       | 58             | 85             | 25                         | <i>B. longum</i>                     | 93.9           | [3]                |
| <i>Clostridium coccooides-Eubacterium rectale</i> group ( <i>Lachnospiraceae</i> )                | F: 5'-CGTACTGACTAGAAGC-3'<br>R: 5'-AGTTYATCTTGGCAAGC-3'                      | 429           | 4       | 55             | 85             | 0.5                        | <i>R. prodansus</i>                  | 85.9           | [3]                |
| <i>Escherichia coli</i> subgroup ( <i>E. coli</i> , <i>Hafnia alvei</i> and <i>Shigella</i> spp.) | F: 5'-GTTAATACCTTGGCTATGA-3'<br>R: 5'-ACCAGGATCTAATCTGTT-3'                  | 340           | 3       | 60             | 85             | 25                         | <i>Escherichia coli</i> DSM 6897     | 90.6           | [4]                |
| Butyryl-CoA CoA transferase                                                                       | F: 5'-GGGACATTCAGTGGAAAYWSITGGCAYATG-3'<br>R: 5'-CCTGCCITTCACATTCACRAANGC-3' | 530           | 3       | 53             | 82             | 25                         | -                                    | -              | [5]                |

\*The coverage (i.e. the percentage of potentially covered taxa within the target) was estimated using the SILVA TestPrime tool with the sSUNR database version 132, allowing one mismatch during primer annealing to simulate realistic PCR behavior [2].

\*\*Detailed breakdown of coverage for the targets at lower taxonomic levels is listed in S1 Table B.

**S1 Table B.**

| Primers set                                        | Target                                                                                            | Coverage (%) |
|----------------------------------------------------|---------------------------------------------------------------------------------------------------|--------------|
| Bacteria (qPCR)                                    | <i>Bacteroides-Prevotella-Porphyrionomus</i>                                                      | 93.7         |
|                                                    | <i>Bifidobacterium</i> spp.                                                                       | 93.7         |
|                                                    | <i>Clostridium coccooides-Eubacterium rectale</i> group ( <i>Lachnospiraceae</i> )                | 95           |
|                                                    | <i>Escherichia coli</i> subgroup ( <i>E. coli</i> , <i>Hafnia alvei</i> and <i>Shigella</i> spp.) | 94           |
| Bacteria (16S rRNA gene V3-V4 amplicon sequencing) | <i>Bacteroides-Prevotella-Porphyrionomus</i>                                                      | 95.7         |
|                                                    | <i>Bifidobacterium</i> spp.                                                                       | 94.1         |
|                                                    | <i>Clostridium coccooides-Eubacterium rectale</i> group ( <i>Lachnospiraceae</i> )                | 95.9         |
|                                                    | <i>Escherichia coli</i> subgroup ( <i>E. coli</i> , <i>Hafnia alvei</i> and <i>Shigella</i> spp.) | 95.1         |

## References

1. Nadkarni MA, Martin FE, Jacques NA, Hunter N. Determination of bacterial load by real-time PCR using a broad-range (universal) probe and primers set. *Microbiology (Reading, England)*. 2002;148(Pt 1):257-66. Epub 2002/01/10. doi: 10.1099/00221287-148-1-257. PubMed PMID: 11782518.
2. Klindworth A, Pruesse E, Schweer T, Peplies J, Quast C, Horn M, et al. Evaluation of general 16S ribosomal RNA gene PCR primers for classical and next-generation sequencing-based diversity studies. *Nucleic acids research*. 2013;41(1):e1. Epub 2012/08/31. doi: 10.1093/nar/gks808. PubMed PMID: 22933715; PubMed Central PMCID: PMC3592464.
3. Rinttila T, Kassinen A, Malinen E, Krogius L, Palva A. Development of an extensive set of 16S rDNA-targeted primers for quantification of pathogenic and indigenous bacteria in faecal samples by real-time PCR. *Journal of applied microbiology*. 2004;97(6):1166-77. Epub 2004/11/18. doi: 10.1111/j.1365-2672.2004.02409.x. PubMed PMID: 15546407.
4. Malinen E, Kassinen A, Rinttila T, Palva A. Comparison of real-time PCR with SYBR Green I or 5'-nuclease assays and dot-blot hybridization with rDNA-targeted oligonucleotide probes in quantification of selected faecal bacteria. *Microbiology (Reading, England)*. 2003;149(Pt 1):269-77. Epub 2003/02/11. doi: 10.1099/mic.0.25975-0. PubMed PMID: 12576600.
5. Louis P, Flint HJ. Development of a semiquantitative degenerate real-time pcr-based assay for estimation of numbers of butyryl-coenzyme A (CoA) CoA transferase genes in complex bacterial samples. *Applied and environmental microbiology*. 2007;73(6):2009-12. Epub 2007/01/30. doi: 10.1128/aem.02561-06. PubMed PMID: 17259367; PubMed Central PMCID: PMC1828812.
